# Supplementary material for: Non-invasive three-dimensional 1H-MR Spectroscopic Imaging of human brain glucose and neurotransmitter metabolism using deuterium labeling at 3T
Source: bioRxiv or medRxiv preprint supplement (doi:10.1101/2022.10.25.22281503), 2022-10-26
Supplement: Supplementary file [file media-1.pdf]

| Minimum Reporting Standards in MR Spectroscopy checklist (according to Lin et al. NMR Biomed 2021)                                                                                                            |                                                                                         |
|---------------------------------------------------------------------------------------------------------------------------------------------------------------------------------------------------------------|-----------------------------------------------------------------------------------------|
| <b>1. Hardware</b>                                                                                                                                                                                            |                                                                                         |
| a. Field strength [T]                                                                                                                                                                                         | 3                                                                                       |
| b. Manufacturer                                                                                                                                                                                               | Siemens                                                                                 |
| c. Model (software version if available)                                                                                                                                                                      | Prisma Fit                                                                              |
| d. RF coils: nuclei (transmit/ receive), number of channels, type, body part                                                                                                                                  | 1H TX/RX 64 channels, head, Siemens                                                     |
| e. Additional hardware                                                                                                                                                                                        | N/A                                                                                     |
| <b>2. Acquisition</b>                                                                                                                                                                                         |                                                                                         |
| a. Pulse sequence                                                                                                                                                                                             | FID-CRT MR spectroscopic imaging                                                        |
| b. Volume of Interest (VOI) locations                                                                                                                                                                         | The excited 55 mm-thick slab was centered around the posterior cingulate region.        |
| c. Nominal VOI size [cm <sup>3</sup> , mm <sup>3</sup> ]                                                                                                                                                      | 200×200×55 mm <sup>3</sup>                                                              |
| d. Repetition Time (TR), Echo Time (TE) [ms, s]                                                                                                                                                               | TR=950 ms / 0.8 ms acquisition delay                                                    |
| e. Total number of Excitations or acquisitions per spectrum                                                                                                                                                   | 1 average                                                                               |
| In time series for kinetic studies                                                                                                                                                                            | N/A                                                                                     |
| i. Number of Averaged spectra (NA) per time-point                                                                                                                                                             | N/A                                                                                     |
| ii. Averaging method (e.g. block-wise or moving average)                                                                                                                                                      | N/A                                                                                     |
| iii. Total number of spectra (acquired / in time-series)                                                                                                                                                      | N/A                                                                                     |
| f. Additional sequence parameters (spectral width in Hz, number of spectral points, frequency offsets); If STEAM: Mixing Time TM; If MRSI: 2D or 3D, FOV in all directions, matrix size, acceleration factors | Bandwidth: 1325 Hz, 588 spectral points, MRSI: 3D, FOV 200×200×130 mm <sup>2</sup> ,    |
| g. Water Suppression Method                                                                                                                                                                                   | WET                                                                                     |
| h. Shimming Method, reference peak, and thresholds for “acceptance of shim” chosen                                                                                                                            | Standard shim + manual adjustment, water peak < 30 Hz                                   |
| i. Triggering or motion correction method (respiratory, peripheral, cardiac triggering, incl. device used and delays)                                                                                         | N/A                                                                                     |
| <b>3. Data analysis methods and outputs</b>                                                                                                                                                                   |                                                                                         |
| a. Analysis software                                                                                                                                                                                          | LCModel 6.3-1                                                                           |
| b. Processing steps deviating from quoted reference or product                                                                                                                                                | N/A                                                                                     |
| c. Output measure (e.g. absolute concentration, institutional units, ratio)                                                                                                                                   | institutional units, ratio                                                              |
| d. Quantification references and assumptions, fitting model assumptions                                                                                                                                       | Simulated in NMRScope-B, macromolecular background                                      |
| <b>4. Data Quality</b>                                                                                                                                                                                        |                                                                                         |
| a. Reported variables (SNR, Linewidth (with reference peaks))                                                                                                                                                 | SNR was calculated using the pseudoreplica method, and linewidth as FWHM of the NAA fit |
| b. Data exclusion criteria                                                                                                                                                                                    | CRLBs >20% for tNAA, tCr and Glu+Gln (Glx)                                              |
| c. Quality measures of postprocessing Model fitting (e.g. CRLB, goodness of fit, SD of residual)                                                                                                              | CRLB                                                                                    |
| d. Sample Spectrum                                                                                                                                                                                            | See Supplemental Digital Content Figure 2                                               |

**Supplemental Digital Content Table 1:** Minimum Reporting Standards for in vivo MR Spectroscopy

Note. – CRLB = Cramér-Rao lower bounds; FID = free induction decay; FOV = field of view; FWHM = full-width-at-half-maximum; Glu = Glutamate; Gln = Glutamine; tNAA = total N-acetylaspartate; SNR = signal-to-noise ratio; tCr = total creatine; VOI = volume of interest.

| Metabolite | Gray matter voxel<br>concentration [a.u.] (CRLB [%]) |              | White matter voxel<br>concentration [a.u.] (CRLB [%]) |              |
|------------|------------------------------------------------------|--------------|-------------------------------------------------------|--------------|
|            | 5 min                                                | 65 min       | 5 min                                                 | 65 min       |
| tCr        | 1.07E4 (4%)                                          | 1.00E4 (5%)  | 7.47E3 (5%)                                           | 6.75E3 (4%)  |
| tNAA       | 2.25E4 (3%)                                          | 2.25E4 (3%)  | 1.90E4 (3%)                                           | 2.03E4 (2%)  |
| Glx4*      | 2.10E4 (7%)                                          | 1.53E4 (10%) | 1.09E4 (10%)                                          | 9.00E3 (11%) |
| Glx23      | 2.68E4 (5%)                                          | 2.76E4 (5%)  | 1.36E4 (8%)                                           | 1.44E4 (6%)  |
| Glu4*      | 1.44E4 (7%)                                          | 1.06E4 (10%) | 7.77E3 (10%)                                          | 6.21E3 (12%) |
| Glu23      | 1.83E4 (7%)                                          | 1.82E4 (8%)  | 8.51E3 (11%)                                          | 6.60E3 (16%) |
| Gln4*      | 6.55E3 (12%)                                         | 4.63E3 (17%) | 3.11E3 (18%)                                          | 2.80E3 (19%) |
| Gln23      | 8.46E3 (13%)                                         | 9.36E3 (13%) | 5.11E3 (17%)                                          | 7.76E3 (12%) |
| Cr         | 7.13E3 (13%)                                         | 5.84E3 (17%) | 5.58E3 (12%)                                          | 4.00E3 (15%) |
| PCr        | 3.60E3 (24%)                                         | 4.19E3 (24%) | 1.89E3 (34%)                                          | 2.75E3 (22%) |
| NAA        | 2.12E4 (3%)                                          | 2.21E4 (3%)  | 1.69E4 (3%)                                           | 1.68E4 (3%)  |
| NAAG       | 1.30E3 (30%)                                         | 4.15E2(111%) | 2.17E3 (14%)                                          | 3.54E3 (9%)  |

\*deuterium labeled  
unlabeled

**Supplemental Digital Content Table 2:** LCModel spectral fit output of a single representative GM and WM voxel for selected metabolites from the first (5 min) and last (60 min) time point after D-glucose ingestion, respectively. Respective spectra and LCModel fits are shown in Supplemental Digital Content Figure 2.

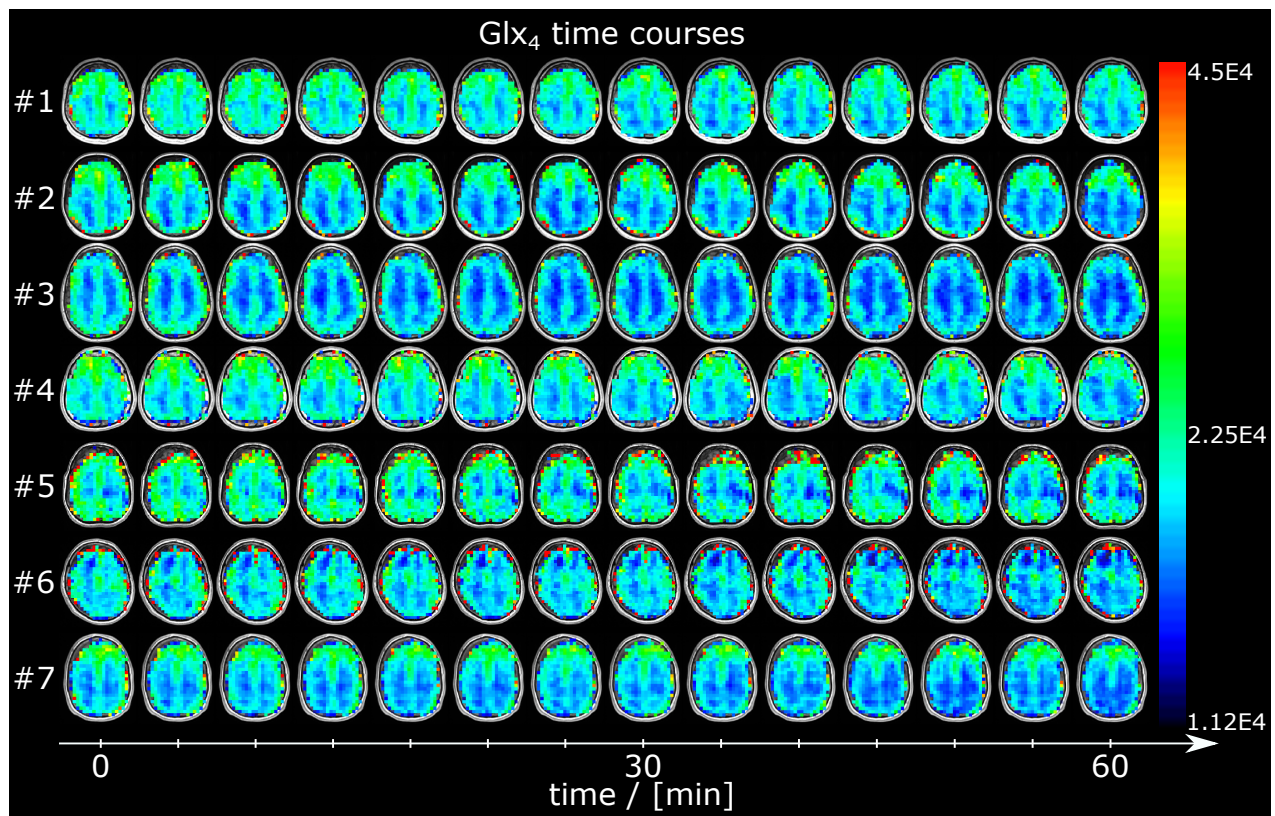

**Supplemental Digital Content Figure 1:** Time courses of axial glutamate+glutamine (Glx<sub>4</sub>) maps from all subjects over the entire measurement visualizing the image intensity decrease over time due to deuterium labeling.

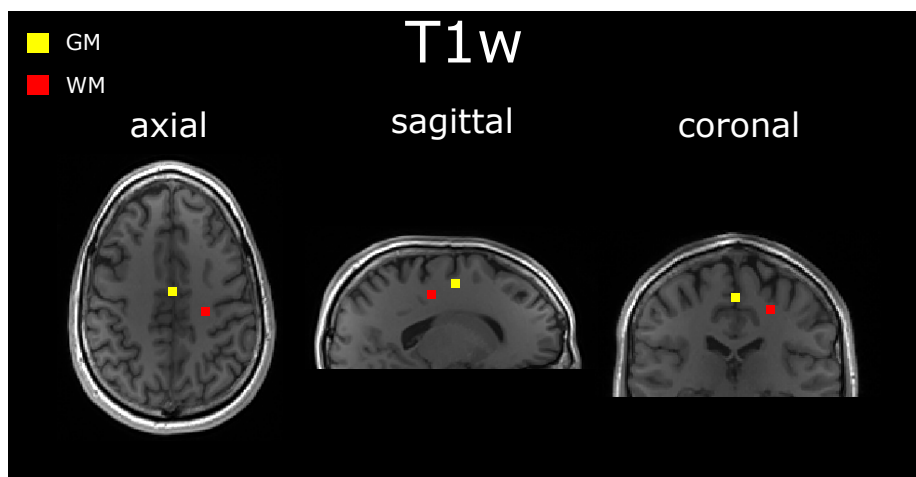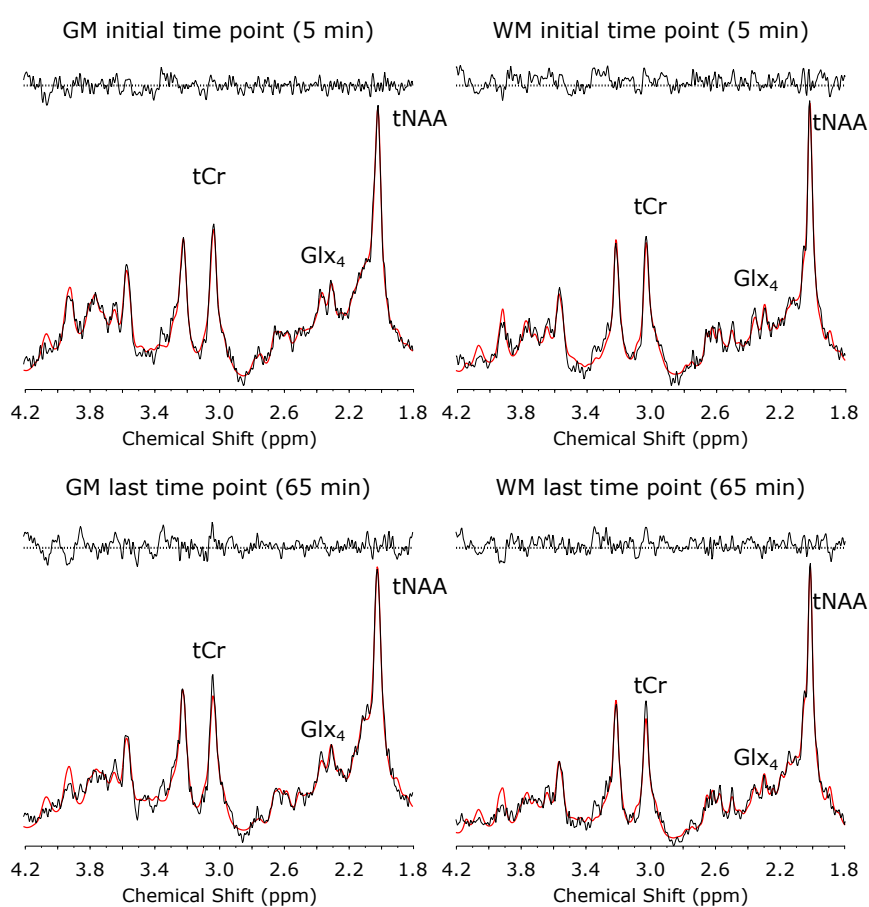

**Supplemental Digital Content Figure 2:** Sample spectra (black) and LCMoDel fit (red) from a single gray matter (GM) and white matter (WM) voxel of one representative volunteer at the beginning (5 min) and the end (65 min) of the MRSI scan. Spectra were first-order corrected for illustration purposes. Relevant metabolites are total creatine (tCr), glutamate+glutamine (Glx) and total N-acetylaspartate (tNAA). Spectral concentration fits of these particular voxels are shown in Supplemental Digital Content Table 1.

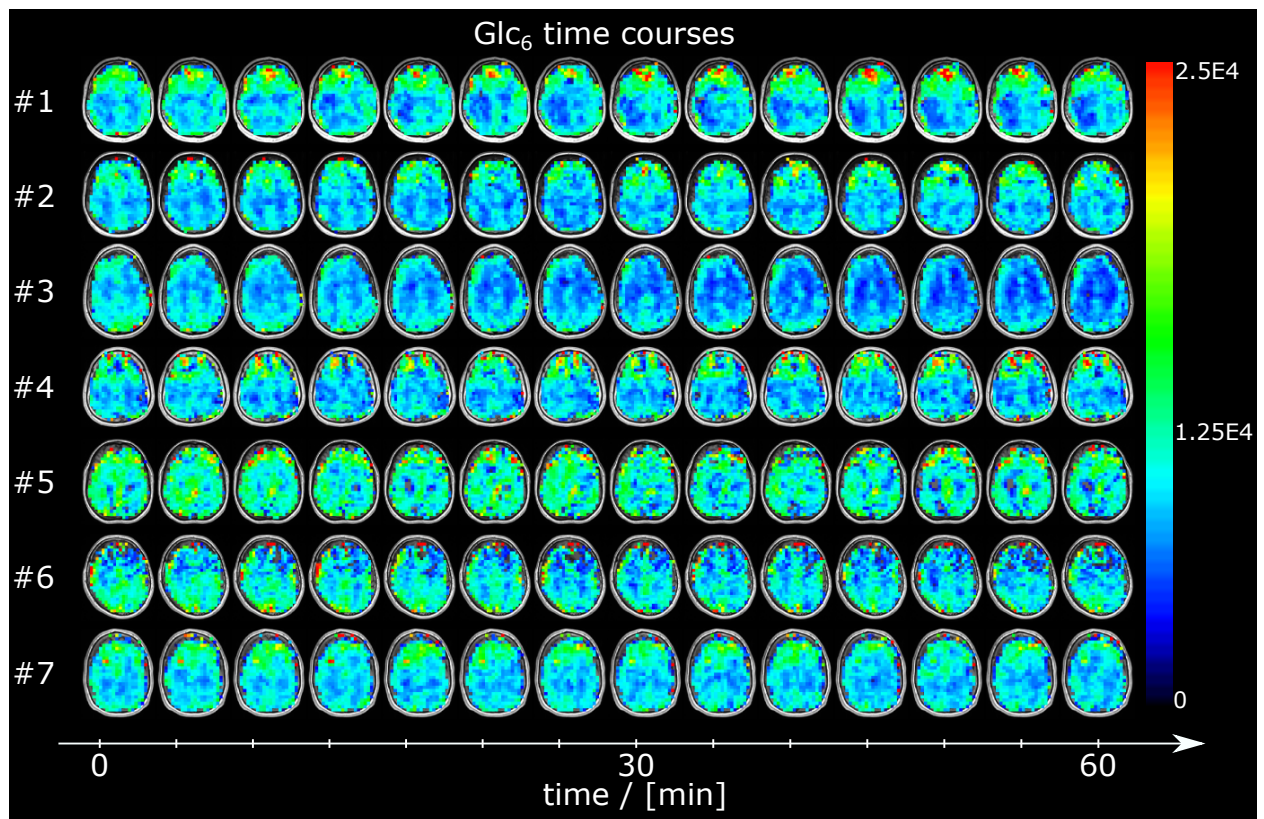

**Supplemental Digital Content Figure 3:** Time courses of axial glucose ( $\text{Glc}_6$ ) maps from all subjects over the entire measurement visualizing the image intensity decrease over time due to deuterium labeling. No quality criteria threshold was applied for  $\text{Glc}_6$  data.
